# Supplementary material for: Sensitive and selective detection of the highly toxic pesticide carbofuran in vegetable samples by a molecularly imprinted electrochemical sensor with signal enhancement by AuNPs
Source: Royal Society of Chemistry journal article supplement (doi:10.1039/c8ra05022h), 2018-01-01
Supplement: c8ra05022h1.pdf [file c8ra05022h1.pdf]

## Supplementary material

### **Sensitive and selective detection of the highly toxic pesticide carbofuran in vegetable samples by a molecularly imprinted electrochemical sensor with signal enhancement by AuNPs**

Peipei Qi, Jiao Wang, Xiangyun Wang, Zhiwei Wang, Hao Xu, Shanshan Di,  
Qiang Wang, Xinquan Wang\*

Institute of Quality and Standard of Agro-products, Zhejiang Academy of  
Agricultural Sciences, Hangzhou 310021, P. R. China

State Key Laboratory Breeding Base for Zhejiang Sustainable Pest and Disease  
Control, Hangzhou 310021, P. R. China

Agricultural Ministry Key Laboratory for Pesticide Residue Detection, Hangzhou  
310021, P. R. China

Key Laboratory of Detection for Pesticide Residues and Control of Zhejiang,  
Hangzhou 310021, P. R. China

\* Corresponding author.

Tel.: + 86 571 86404355

Fax: + 86 571 86419060

E-mail address: wangxinquan212@163.com

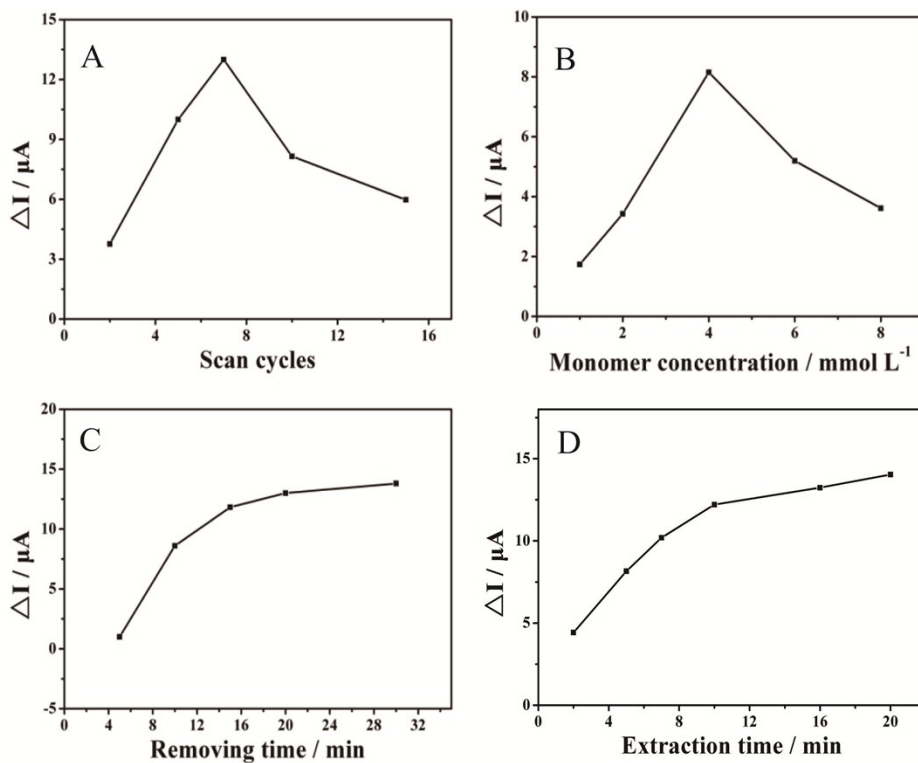

Fig.S1 Effect of (A) scan cycles, (B) monomer concentration, (C) removing time and (D) incubation time on the current response ( $\Delta I$ ) of the obtained sensor.

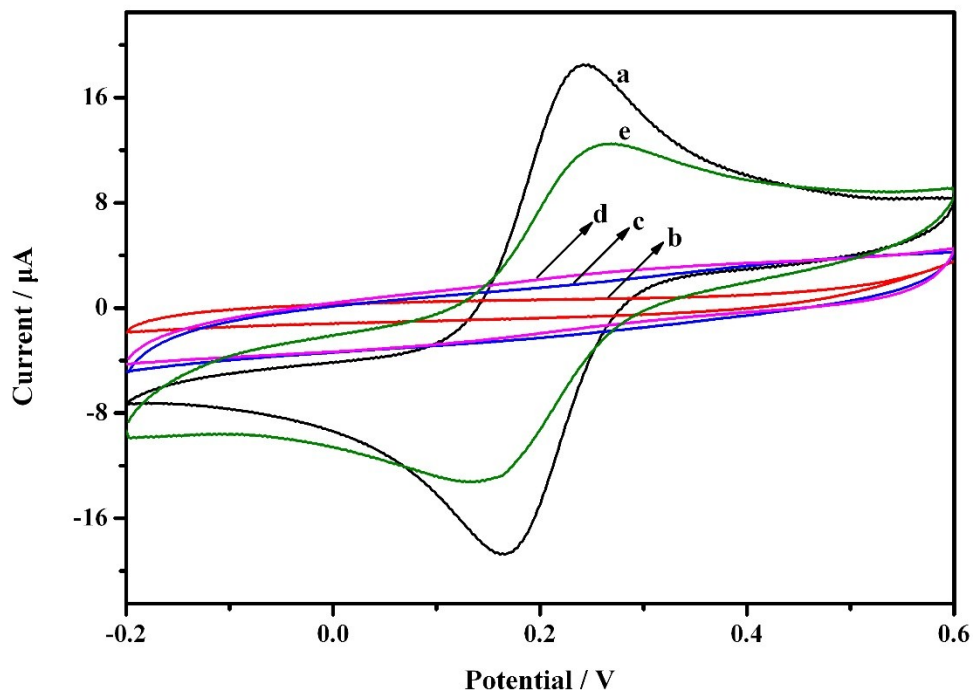

Fig.S2 (A) The selection of the solvent for template removal. Cyclic voltammograms of (a) AuNPs/GCE, (b) MIP/AuNPs/GCE before removing carbofuran, (c) MIP/Au NPs/GCE after removing carbofuran by methyl alcohol-acetic acid (9:1, V/V) solution, (d) MIP/AuNPs/GCE after removing carbofuran by 0.1 mol L<sup>-1</sup> sulphuric acid, and (e) MIP/AuNPs/GCE after removing carbofuran by 0.1 mol L<sup>-1</sup> sodium hydroxide methanol. Detection solution: 1 mmol L<sup>-1</sup> K<sub>3</sub>Fe(CN)<sub>6</sub>/K<sub>4</sub>Fe(CN)<sub>6</sub> (1:1) containing 0.1 mol L<sup>-1</sup> KCl solution. Removal time: 20 min, scan rate: 0.05 V s<sup>-1</sup>.

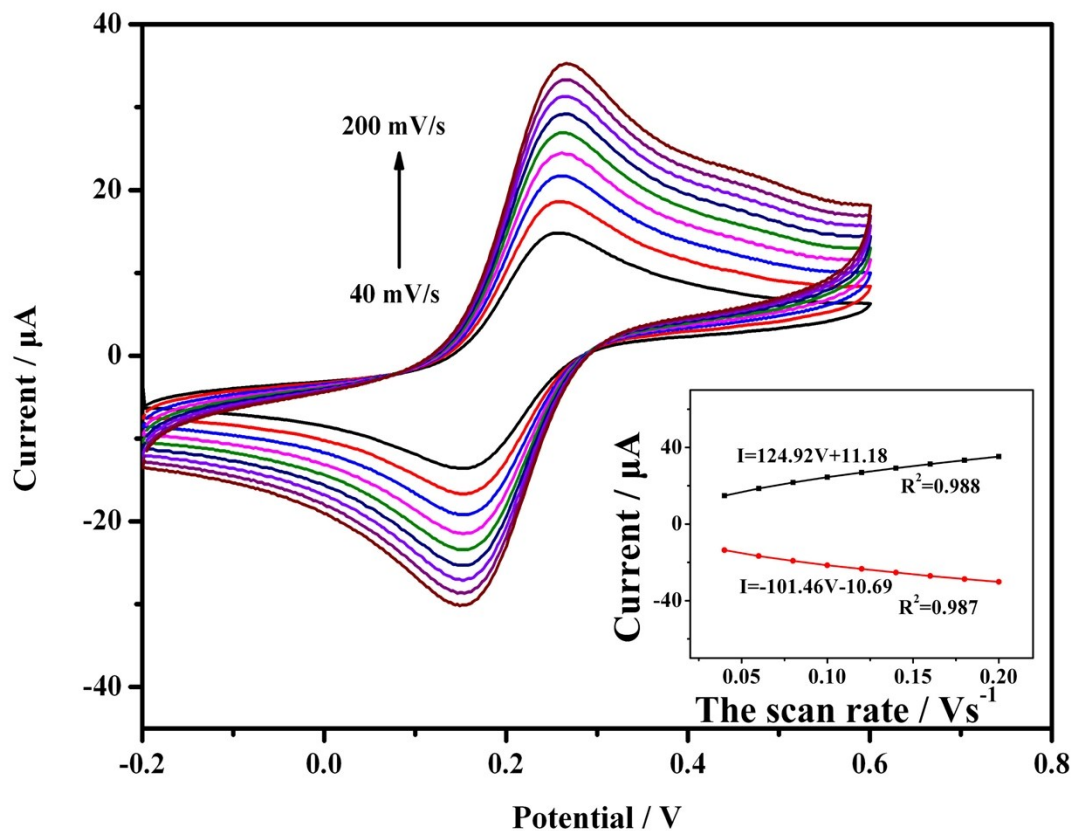

Fig.S3 Cyclic voltammograms of the MIP/Au NPs/GCE in 1 mmol L<sup>-1</sup> K<sub>3</sub>Fe(CN)<sub>6</sub>/K<sub>4</sub>Fe(CN)<sub>6</sub> (1:1) containing 0.1 mol L<sup>-1</sup>KCl solution at the scan rate of 0.04, 0.06, 0.08, 0.1, 0.12, 0.14, 0.16, 0.18 and 0.2 V s<sup>-1</sup>. Inset: the anodic peak current (top) and cathodic peak current (bottom) vs. the scan rate.
